# Supplementary material
Source: publisher figshare collection journal article supplement (https://gsapubs.figshare.com/ndownloader/files/22747517)
Supplement: Supplementary file 1 [file 22747517]

Proffett, "High Cu grades in porphyry Cu deposits and their relationship to emplacement depth of magmatic sources." Geology, Table DR1

TABLE DR1. Characteristics of Selected Porphyry Copper Deposits and Depth Estimates for their Magmatic Sources. All deposits listed have large "background potassic" zones, in which the essential alteration is biotitization of mafic minerals, with low grade Cu. The emphasis in this table is on higher grade zones contained within the larger zones of background potassic alteration.

| Deposit; location; "type" *                                   | Pre-ore host rocks                                                                                        | Porphyries closest in age to ore                                                                                                                                                  | Higher grade early Cu mineralization                                                                                                                                                                                         | Cu-Fe-S-O assemblage of higher Cu grade                                                                                                                     | Alteration assemblage of higher Cu grade                                                                                                        | Data sources for characteristics                                                                                | Depth of emplacement of magmatic source                                                                                                            | Type of evidence for emplacement depth                                                                                                                                                                   | Data sources for emplacement depth                                                                         |
|---------------------------------------------------------------|-----------------------------------------------------------------------------------------------------------|-----------------------------------------------------------------------------------------------------------------------------------------------------------------------------------|------------------------------------------------------------------------------------------------------------------------------------------------------------------------------------------------------------------------------|-------------------------------------------------------------------------------------------------------------------------------------------------------------|-------------------------------------------------------------------------------------------------------------------------------------------------|-----------------------------------------------------------------------------------------------------------------|----------------------------------------------------------------------------------------------------------------------------------------------------|----------------------------------------------------------------------------------------------------------------------------------------------------------------------------------------------------------|------------------------------------------------------------------------------------------------------------|
| Yerington Mine; Yerington district, Nevada, USA "A-vein type" | Quartz monzodiorite and quartz monzonite of Yerington Batholith, ~169 Ma                                  | Sequence of 6 granite porphyries in closely-spaced cluster above porphyritic granite source batholith (~168 Ma; part of Yerington batholith)                                      | Veinlet stockworks of Cu-sulfides, q & mt in and near 1st, 2nd and 4th porphyry intrusions; abundant "A" type granular q veins carry much of the Cu sulfides. Veinlets commonly truncated at porphyry contacts               | bn-cc-mt, bn-cp-mt, cp-mt; sec mt more abundant than Cu sulfides; (cp common only in areas of late veins and sericitic alt'n overprinting)                  | q-Kf-bi-±olig-(rt); bi may be chloritized and feldspars sericitized due to late overprint                                                       | J.M. Proffett, unpub., 1966-1976; M.T. Einaudi and others, unpub., 1969-1982; Proffett, 1979;                   | Top of underlying porphyritic granite source estimated to have been 4 km below surface at time of mineralization                                   | Structural reconstruction of volcanic surface above deposit for time of mineralization; underlying pluton exposed in sectional view due to tilting                                                       | Mapping summarized in Proffett, 1977 & Proffett and Dilles, 1984, 1991; see also Dilles and Proffett, 1995 |
| Alumbrera, Argentina "A-vein type"                            | Andesites of the Farallón Negro Volcanics, ~12.5-8.1 Ma                                                   | Sequence of 7 granitic porphyries in closely-spaced cluster, ~7 Ma; Coarse-matrix porphyry ~650 m below surface suggests proximity to magmatic source                             | Veinlet stockworks of Cu-sulfides, q & mt in and near 1st, 3rd and 4th porphyry intrusions; abundant "A" type granular q veins carry much of the Cu sulfides. Veinlets commonly truncated at porphyry contacts               | cp-mt; cp-bn-mt where late alt'n overprint is weak; cp-py-±relict mt where late overprint is strong; sec mt usually > Cu sulfides, but some A-veins lack mt | q-Kf-bi-mt-(rt); q-Kf-bi-(rt); bi may be chloritized and feldspars sericitized due to late overprint                                            | Proffett, 2003                                                                                                  | Top of magmatic source below Alumbrera porphyries interpreted as ~3.5 km below surface at time of mineralization                                   | Volcanic rocks of similar age to Alumbrera porphyries project ~2.8 km above deposit surface; drill holes show coarse matrix porphyries similar to Yerington cupolas ~0.7 below deposit surface           | Proffett, 2003; (Sasso and Clark, 1998 for radiometric ages).                                              |
| Batu Hijau, Indonesia "A-vein type"                           | Middle Miocene andesites.                                                                                 | Sequence of 3-4 tonalite porphyries in closely-spaced, ~3.7 Ma cluster; widening of porphyries and coarsening of matrix ~1 km below surface suggests proximity to magmatic source | Veinlet stockworks of Cu-sulfides, q & mt in and near 1st, and to lesser extent, 2nd porphyry intrusions; abundant "A" type granular q veins carry much of the Cu sulfides. Veinlets commonly truncated at porphyry contacts | bn-dg-mt, bn-cc-mt; bn-cp where late alteration overprint is present, cp-mt, cp-only or cp-py where it is very strong; sec mt usually > Cu sulfides         | q-sec olig-bi-(rt); olig is the sec feldspar instead of Kf due to low-K rocks; bi may be chloritized and olig sericitized due to late overprint | P.A. Mitchell, unpub., 1997-1998; J.M. Proffett, unpub., 1997-2004; Clode et al., 1999; Setyandhaka et al.,2008 | Top of probable magmatic source below Batu Hijau interpreted to have been ~3-3.5 km below surface at time of mineralization                        | ~6.8 Ma volcanoclastic unit and Plio-Pleistocene sedimentary-volcanic unit project ~2 km above deposit surface; drill holes show widening of porphyries & grain size increase ~1km below deposit surface | Garwin, 2000; Setyandhaka et al.,2008                                                                      |
| El Salvador, Chile "A-vein type"                              | Upper Cretaceous andesitic sedimentary and volcanic rocks; Paleocene-Eocene felsic volcanics & intrusions | Sequence of feldspar porphyries of granodiorite to quartz monzodiorite composition, in closely-spaced cluster, 41-42 Ma                                                           | Veinlet stockworks of Cu-sulfides & q in and near earliest feldspar porphyry (K porphyry); abundant "A" type granular q veins carry much of the Cu sulfides. Veinlets commonly truncated at porphyry contacts                | cp-bn, cp-py; py present mainly near edge of deposit and with late overprint; mt not present, or alt'd to hm in high grade zones                            | q-Kf-bi-anh-±olig-(rt)                                                                                                                          | Gustafson and Hunt, 1975; Gustafson and Quiroga, 1995; Gustafson et al., 2001                                   | Present surface thought to have been ~1-2 km below surface at time of mineralization; evidence unavailable for depth of underlying magmatic source | Depth of present surface below paleosurface based on reasonable estimates for thickness of early Cenozoic volcanic rocks that originally were above the deposit                                          | Gustafson and Hunt, 1975; Gustafson et al., 2001                                                           |

|                                                                         |                                                                                         |                                                                                                                        |                                                                                                                                                                                                                                                                |                                                                                                                                                                                                                                                |                                                                                                                                                                                                       |                                                                                                                                                 |                                                                                                                                                                            |                                                                                                                                                                                                                           |                                                                                                                                                                                                           |
|-------------------------------------------------------------------------|-----------------------------------------------------------------------------------------|------------------------------------------------------------------------------------------------------------------------|----------------------------------------------------------------------------------------------------------------------------------------------------------------------------------------------------------------------------------------------------------------|------------------------------------------------------------------------------------------------------------------------------------------------------------------------------------------------------------------------------------------------|-------------------------------------------------------------------------------------------------------------------------------------------------------------------------------------------------------|-------------------------------------------------------------------------------------------------------------------------------------------------|----------------------------------------------------------------------------------------------------------------------------------------------------------------------------|---------------------------------------------------------------------------------------------------------------------------------------------------------------------------------------------------------------------------|-----------------------------------------------------------------------------------------------------------------------------------------------------------------------------------------------------------|
| Ann-Mason Pass;<br>Yerington district,<br>Nevada, USA "Early halo type" | Quartz monzodiorite and quartz monzonite of Yerington Batholith, ~169 Ma                | Swarm of granite porphyry dikes above porphyritic granite source batholith (~168 Ma; part of Yerington batholith)      | Swarms of thin, early veinlets in subparallel sets with few mm- to few cm-thick alt'n halos, and with most Cu-sulfides diss in the halos; truncation of early veinlets at porphyry contacts is not commonly observed                                           | cp-bn, cp; cp-py in peripheral parts and with late overprint; prim mt partly to completely destroyed; little or no sec mt                                                                                                                      | Early veinlet halos are ser-q-Kf-bi-(rt); sec Kf between ser and q                                                                                                                                    | J.M. Proffett, unpub., 1966-1976; D.L. Gustafson, unpub. 1971; A. Souverón, unpub., 1975; Dilles, 1984, 1987; Dilles and Einaudi, 1992          | Top of underlying porphyritic granite source estimated to have been 5 km below surface at time of mineralization                                                           | Structural reconstruction of volcanic surface above deposit for time of mineralization; underlying pluton exposed in sectional view due to tilting                                                                        | Mapping summarized in Proffett, 1977 & Proffett and Dilles, 1984, 1991; see also Dilles and Proffett, 1995                                                                                                |
| Bear; Yerington district, Nevada, USA "Early halo type"                 | Quartz monzodiorite and quartz monzonite of Yerington Batholith, ~169 Ma                | Swarm of granite porphyry dikes above porphyritic granite source batholith (~168 Ma; part of Yerington batholith)      | Swarms of thin, early veinlets with few mm- to few cm-thick alt'n halos, and with most Cu-sulfides diss in the halos; truncation of early veinlets at porphyry contacts is not commonly observed                                                               | cp-bn, cp; cp-py in peripheral parts and with late overprint; prim mt partly to completely destroyed; little or no sec mt                                                                                                                      | Early veinlet halos are ser-q-Kf-bi-(rt); sec Kf between ser and q                                                                                                                                    | J.M. Proffett, unpub., 1967-1968                                                                                                                | Top of underlying porphyritic granite source estimated to have been 5.2 km below surface at time of mineralization                                                         | Structural reconstruction of volcanic surface above deposit for time of mineralization                                                                                                                                    | Mapping summarized in Proffett, 1977 & Proffett and Dilles, 1984, 1991                                                                                                                                    |
| Butte; Montana, USA "Early halo type"                                   | Butte granite of the Boulder batholith, ~74-76 Ma                                       | Steward quartz porphyries, three 3-30 m thick, steep, WNW trending dikes of mafic-poor granite porphyry, ~65-70 Ma (?) | Sets of subparallel, thin, early veinlets with few mm- to few cm-thick EDM alt'n halos with abundant diss Cu sulfides (also "S" or "PGS" halos in upper part of potassic zone); veinlet swarms not closely associated spatially with individual porphyry dikes | cp, cp-bn and cp-py, diss in EDM halos; cp-py in "S" or "PGS" halos; prim mt partly to completely destroyed and sec mt rare or absent in EDM halos, but may occur in the veinlets; mt rare in "S" or "PGS" halos but may occur in the veinlets | EDM halos: sec bi & ser in plag & mafic sites; sec Kf between ser and primary q grains; andal & other Al-silicates may be present; rt in mafic sites; "S" or "PGS" halos lack biotite and may lack Kf | Meyer, 1965; Meyer et al., 1968; J.M. Proffett, unpub., 1971-1974; Brimhall, 1973, 1977; Proffett, 1973; Roberts, 1973, 1975; Rusk et al., 2008 | Deepest drill exposures estimated to have been ~7 km below surface during mineralization; magmatic source of fluids and quartz porphyries not exposed and was still deeper | Volcanic roof rocks related to host batholith are >20 km distant, consistent with deep exposure. Fluid inclusion Th in deepest early alteration suggest P≥1.7 kb in order to be consistent with mineral-based T estimates | Volcanics: Smedes et al., 1973; Fluid inclusions: Roberts, 1973, 1975; also see Rusk et al., 2008; mineral-based T: Brimhall, 1977; Roberts, 1973, 1975; Zhang et al., 1999a & b; Ages: Lund et al., 2005 |
| Chuquicamata, Chile "Early halo type"                                   | East porphyry, the main and largest intrusion of the Chuqui Porphyry Complex, ~35-36 Ma | Banco porphyry and West porphyry, small intrusions in the Chuqui Porphyry Complex, 34-35 Ma (latest Eocene)            | Sets of thin subparallel early veinlets with few mm- to few cm-thick alteration halos that contain abundant diss Cu sulfides; veinlet swarms not closely associated spatially with individual porphyry intrusions                                              | bn-(dg)-(tn)-(cp)-(±mb); cp-bn or cp with late alt'n overprint; no py except with strong late alt'n overprint, generally no mt or hm                                                                                                           | Two main types: "K-sil": Kf-q-anh-±Na plag-(rt)-(±ser) ; "Early ser": ser-q-anh-±Kf-(rt). Sec Kf commonly occurs between q and ser                                                                    | Ossandón et al., 2001; J.M. Proffett, unpub., 2001-2007; Faunes et al., 2005                                                                    | Direct depth estimate not available; geology consistent with relatively deep magmatic source, which is not exposed, even in deepest exposures                              | Late Cretaceous-Eocene section 4-5 km thick projects well above Pz-TR metamorphic and granitic hosts of Chuqui Porphyry Complex                                                                                           | Tomlinson and Blanco, 1997; Dilles et al., 1997; Ossandón et al., 2001; J.M. Proffett, unpub., 2005-2007                                                                                                  |
| RT, Chuquicamata, district, Chile "Early halo type"                     | RT porphyry (= East porphyry) of the Chuqui Porphyry Complex, ~35-36 Ma                 | Small intrusions similar to the Banco porphyry and West porphyry of Chuquicamata, 34-35 Ma (latest Eocene)             | Sets of thin, subparallel, early veinlets with few mm- to few cm-thick alteration halos that contain abundant diss Cu sulfides; veinlet swarms not closely associated spatially with individual porphyry intrusions                                            | bn-(dg)-(cp)-(±mb); cp present mainly with late alteration overprint; generally no py, mt or hm                                                                                                                                                | Kf-q-ser-bi-(rt)-±andal; sec Kf commonly occurs between q and ser; ser may occur as relict clusters in interior of Kf grains                                                                          | J.M. Proffett, unpub., 2002-2006                                                                                                                | Direct depth estimate not available; geology consistent with relatively deep magmatic source, which is not exposed                                                         | Late Cretaceous-Eocene section 4-5 km thick projects well above Pz-TR metamorphic and granitic hosts of Chuqui Porphyry Complex                                                                                           | Tomlinson and Blanco, 1997; Dilles et al., 1997; Ossandón et al., 2001; J.M. Proffett, unpub., 2005-2007                                                                                                  |

|                                                        |                                                                   |                                                                                                            |                                                                                                                                                                                                                                                               |                                                                                                                                                                                                             |                                                                                                                                              |                                                                                  |                                                                                                                    |                                                                                                                           |                                                                                                          |
|--------------------------------------------------------|-------------------------------------------------------------------|------------------------------------------------------------------------------------------------------------|---------------------------------------------------------------------------------------------------------------------------------------------------------------------------------------------------------------------------------------------------------------|-------------------------------------------------------------------------------------------------------------------------------------------------------------------------------------------------------------|----------------------------------------------------------------------------------------------------------------------------------------------|----------------------------------------------------------------------------------|--------------------------------------------------------------------------------------------------------------------|---------------------------------------------------------------------------------------------------------------------------|----------------------------------------------------------------------------------------------------------|
| MM, Chuquicamata, district, Chile<br>"Early halo type" | Triassic granodiorite; Paleozoic and/or Triassic volcanic rocks   | MM porphyry, quartz porphyry (late Eocene)                                                                 | EDM - like vein halos (commonly overprinted by late pyritic-sericitic alt'n)                                                                                                                                                                                  | bn-(dg)-(cp), cp-bn, cp, cp-py; cp and py mainly with late alteration overprint; generally no mt or hm                                                                                                      | Kf-q-ser-bi-(rt); sec Kf commonly occurs between q & ser                                                                                     | Sillitoe et al, 1996; J.M. Proffett, unpub., 2001-2007; Müller and Quiroga, 2003 | Direct depth estimate not available; geology consistent with relatively deep magmatic source, which is not exposed | Late Cretaceous-Eocene section 4-5 km thick lies just above deposit                                                       | Tomlinson and Blanco, 1997; Dilles et al., 1997; Ossandón et al., 2001; J.M. Proffett, unpub., 2005-2007 |
| Lomas Bayas, Chile<br>"Early halo type"                | San Cristobal batholith of medium-grained granodiorite, ~61-64 Ma | Lomas porphyry, small granodiorite (and/or granite?) porphyry bodies scattered within the mineralized area | Sets of thin, subparallel early veinlets with few mm- to few cm-thick EDM-type alteration halos that contain oxides after Cu sulfides; veinlet swarms not closely associated spatially with individual porphyry intrusions. Mineralized breccias also present | Cu-oxide minerals, limonite and relict sulfides suggest cp and bn, with local minor py, in EDM veins and halos, and in bx; mt partly to completely destroyed in EDM veins and halos; local minor mt near bx | EDM halos: ser-Kf-sec bi-(rt); Kf common between ser and prim q; Bx: bi-Kf-q-tm; Kf-q-tm; q-tm                                               | Shrake et al., 1996; J.M. Proffett, unpub., 1996                                 | No direct evidence; geology consistent with relatively deep magmatic source, which is not exposed                  | Large, medium-grained pluton is main host; volcanics of age similar to host are exposed > 12 km to east and > 20 km to NW | Boric et al., 1990; Shrake et al., 1996                                                                  |
| Pelambres, Chile<br>"Early halo type"                  | Large stock of quartz diorite-tonalite; ~10 Ma                    | Small quartz diorite-tonalite porphyries; ~10 Ma                                                           | Sets of thin, subparallel early veinlets with few mm- to few cm-thick alteration halos that contain abundant diss Cu sulfides ("Type 4 veins"); veinlet swarms not closely associated spatially with individual porphyries. Mineralized breccias also present | cp-bn, cp, cp-py; py present only locally, mainly near edge of deposit;                                                                                                                                     | Type 4 vein halos: Kf-q-ser-bi-(rt)-± andal; bx: medium-coarse-grained sec bi, q, Kf; some bx contains alt'n similar to that in Type 4 halos | J.M. Proffett, unpub., 1980-1981; also see Atkinson et al., 1996                 | No direct evidence; geology consistent with relatively deep magmatic source, which is not exposed                  | Wall rocks of late Miocene host stock are Lower Cretaceous, but structural relationships not available                    | Vicente, 1970; Atkinson et al., 1996                                                                     |

Abbreviations: alt'n = alteration; andal = andalusite; anh = anhydrite; bi = biotite; bn = bornite; bx = breccia; cc = chalcocite or digenite; cp = chalcopyrite; dg = digenite; diss = disseminated; EDM = early dark micaceous; hm = hematite; Kf = K-feldspar; mb = molybdenite; mt = magnetite; olig = oligoclase; P = pressure; plag = plagioclase; prim = primary; py = pyrite; PZ = Paleozoic; q = quartz; rt = rutile; sec = secondary; ser = sericite; ser'c = sericitic; T = temperature; Th = fluid inclusion homogenization T; tm = tourmaline; TR = Triassic; ( ) = minor phase; ± = phase not always present; unpub. = unpublished work

\* "type" refers to type of high Cu grade zones as described in text

**Proffett, "High Cu grades in porphyry Cu deposits and their relationship to emplacement depth of magmatic sources." *Geology*, Table DR1 references**

**REFERENCES FOR TABLE DR1**

- Atkinson, W.W., Souviron, A., Vehrs, T.I. and Faunes, A., 1996, Geology and mineral zoning of the Los Pelambres porphyry copper deposit, Chile: Society of Economic Geologists Special Publication No. 5, p. 131-156.
- Boric, R., Díaz, F. and Makshev, V., 1990, Geología y yacimientos metalíferos de la region de Antofagasta: Servicio Nacional de Geología y Minería-Chile, Boletín 40, 246 p.
- Brimhall, G.H., 1973, Mineralogy, texture and chemistry of early wall rock alteration in the deep underground mines and Continental area, Butte district, Montana, *in* Miller, R.N., ed., Guidebook to Butte Field Meeting, Montana Bureau of Mines and Geology publication O1, p. H1-H4.
- Brimhall, G.H., 1977, Early fracture-controlled disseminated mineralization at Butte, Montana: *Economic Geology*, v. 72, p. 37-59.
- Clode, C., Proffett, J., Mitchell, P. and Munajat, I., 1999, Relationships of intrusion, wall-rock alteration and mineralization in the Batu Hijau copper-gold porphyry deposit: *in* Weber, G., ed. PACRIM '99 Congress: Australasian Institute of Mining and Metallurgy Publication Series No 4/99, p. 485-498.
- Dilles, J.H., 1984, The petrology and geochemistry of the Yerington batholith and the Ann-Mason porphyry copper deposit, western Nevada [unpub. Ph.D.]: Stanford University, Stanford, California, 389 p.
- Dilles, J.H., 1987, Petrology of the Yerington batholith, Nevada: Evidence for evolution of porphyry copper ore fluids: *Econ. Geol.*, v. 82, p. 1750-1789.
- Dilles, J. H. and Einaudi, M. T., 1992, Wall rock alteration and hydrothermal flow paths about the Ann-Mason porphyry copper deposit, Nevada-a 6 km vertical reconstruction: *Economic Geology*, v. 87, p. 1963-2001.
- Dilles, J. H. and Proffett, J. M., 1995, Metallogenesis of the Yerington batholith, Nevada: *Arizona Geological Society Digest* 20, p. 306-315.
- Dilles, J.H., Tomlinson, A.J., Martin, M.W. and Blanco, N., 1997, El Abra and Fortuna complexes: A porphyry copper batholith sinistrally displaced by the Falla Oeste: *VIII Congreso Geológico Chileno*, v. 3, p. 1883-1887.
- Garwin, S.L., 2000, The setting, geometry and timing of intrusion-related hydrothermal systems in the vicinity of the Batu Hijau porphyry copper-gold deposit, Sumbawa, Indonesia: Ph.D thesis, University of Western Australia, Nedlands, 320 p.

- Gustafson, L.B. and Hunt, J.P., 1975, The porphyry copper deposit at El Salvador, Chile: *Economic Geology*, v. 70, p. 857-912.
- Gustafson, L.B. and Quiroga G., Jorge, 1995, Patterns of mineralization and alteration below the porphyry copper orebody at El Salvador, Chile: *Econ. Geol.*, v. 90, p. 2-16.
- Gustafson, L.B., Orquera, W., McWilliams, M., Castro, M., Olivares, O., Rojas, G., Maluenda, J. and Mendez, M., 2001, Multiple centers of mineralization in the Indio Muerto district, El Salvador, Chile: *Econ. Geol.*, v. 96, p. 325-350.
- Lund, K., Aleinikoff, J. and Kunk, M., 2005, Geochronological evidence of multiple overlapping, fracture-controlled magmatic and hydrothermal pulses in the Butte district: genetic implications for Ag and Cu veins and porphyry Mo: *Geological Society of America Abstracts with Programs* v. 37, no.7, p. 314.
- Meyer, C., 1965, An early potassic type of wall rock alteration at Butte, Montana: *American Mineralogist*, v. 50, p. 1717-1722.
- Meyer, C., Shea, E.P., Goddard, C.C., and staff, 1968, Ore deposits at Butte, Montana: *in* Ridge, J.D., ed., *Ore deposits of the United States, 1933-1967: American Institute of Mining, Metallurgical and Petroleum Engineers*, New York, p. 1373-1416.
- Müller, G. and Quiroga, J., 2003, Geology of the MM copper deposit, Chuquicamata district-an update (abs): *Congreso Geológico Chileno*.
- Ossandón, G., Fréaut, R., Gustafson, L.B., Lindsay, D.D. and Zentilli, M., 2001, Geology of the Chuquicamata Mine: A Progress Report: *Economic Geology*, v 96, p. 249-270.
- Proffett, J.M., 1977, Cenozoic Geology of the Yerington District, Nevada, and implications for the nature and origin of Basin and Range faulting: *Geological Society of America Bulletin*, v. 88, p. 247-266.
- Proffett, J. M., 1979, Ore Deposits of the Western United States: A Summary: *in* Ridge, J.D., ed., *Papers on mineral deposits of Western North America (I.A.G.O.D. 5th Symposium Proc.)*, Nevada Bureau of Mines and Geological Report. 33, p. 13-32.
- Proffett, J.M., 2003, Geology of the Bajo de la Alumbrera Porphyry Copper-Gold Deposit, Argentina: *Economic Geology*, v. 98, p. 1535-1574.
- Proffett, J.M. and Dilles, J.H., 1984, Geologic map of the Yerington District, Nevada: Nevada Bureau of Mines and Geology Map 77.
- Proffett, J.M., and Dilles, J.H., 1991, Middle Jurassic volcanic rocks of the Artesia Lake and Fulstone Spring sequences, Buckskin Range, Nevada: *in* Buffa, R. H. and Coyner, A. R., eds., *Geology and ore deposits of the Great Basin, field trip guidebook compendium*, Geological Society of Nevada, p. 1031-1036.

- Roberts, S. A., 1973, Pervasive early alteration in the Butte district, Montana: in Miller, R. N., ed., Guidebook to Butte Field Meeting, Montana Bureau of Mines and Geology publication O1, p. HH-1 to HH-8.
- Roberts, S.A., 1975, Early hydrothermal alteration and mineralization in the Butte district, Montana: unpubl. Ph. D. thesis, Harvard University, 173 p.
- Rusk, B.G., Reed, M.H. and Dilles, J.H., 2008, Fluid inclusion evidence for magmatic-hydrothermal fluid evolution in the porphyry copper-molybdenum deposit at Butte, Montana: *Economic Geology*, v. 103, p. 307-334.
- Sasso, A. M. and Clark, A. H., 1998, The Farallón Negro group, northwest Argentina: magmatic, hydrothermal and tectonic evolution and implications for Cu-Au metallogeny in the Andean back-arc: *Society of Economic Geologists Newsletter*, no 34, p. 1, 8-18.
- Setyandhaka, D., Arif, J. and Proffett, J., 2008, Characteristics of the roots of a classic Cu-Au porphyry system: the Batu Hijau porphyry deposit, Indonesia: in PACRIM '08 Congress: Australasian Institute of Mining and Metallurgy Publication Series No. , p.
- Shrake, T.C., Thurston, P., Ernst, D. and Ashleman, J., 1996, Geology of Chile's Lomas Bayas porphyry copper deposit: *Mining Engineering*, v. 48, n. 3, p. 37-42.
- Sillitoe, R.H., Marquardt, J.C., Ramírez F., Becerra, H. and Gómez, M., 1996, Geology of the concealed MM porphyry copper deposit, Chuquibambilla district, northern Chile: *Society of Economic Geologists Special Publication No. 5*, p. 59-70.
- Smedes, H.W., Klepper, M.R. and Tilling, R.I., 1973, The Boulder batholith, Montana: in Miller, R. N., ed., Guidebook to Butte Field Meeting, Montana Bureau of Mines and Geology publication O1, p. E1-E18.
- Tomlinson, A.J. and Blanco, N., 1997, Structural evolution and displacement history of the West fault system, Precordillera, Chile: part 2, postmineral history: *VIII Congreso Geológico Chileno*, v. 3, p. 1878-1882.
- Vicente, J.C., 1970, Paleogeographic and structural picture of Los Pelambres area: Universidad de Chile, Departamento de Geología, Report prepared for mining project NU-ENAMI CHILE-28, 7. p.
- Zhang, L., Dilles, J.H., Field, C.W. and Reed, M.H., 1999a, Oxygen and hydrogen isotope geochemistry of pre-main stage porphyry Cu-Mo mineralization at Butte, Montana: *Geological Society of America Abstracts with Programs* v. 31, p. A381.
- Zhang, L., Field, C.W., Dilles, J.H. and Reed, M.H., 1999b, Sulfur isotope record of deep porphyry Cu-Mo mineralization, Butte district, Montana: *Geological Society of America Abstracts with Programs* v. 31, p. A381-A382.
